# Supplementary material for: Hybridization state transition-driven carbon quantum dot (CQD)-based resistive switches for bionic synapses
Source: Royal Society of Chemistry journal article supplement (doi:10.1039/d3mh00117b), 2023-01-01
Supplement: d3mh00117b1.pdf [file d3mh00117b1.pdf]

## Hybridization State Transition-Driven Carbon Quantum Dots (CQDs)-based Resistive Switches for Bionic Synapses

*Tianqi Yu,<sup>a</sup> Yong, Fang,<sup>a</sup> Xinyue Chen,<sup>a</sup> Min Liu,<sup>a</sup> Dong Wang,<sup>a</sup> Shilin Liu,<sup>a</sup> Wei Lei,<sup>a</sup> Helong Jiang,<sup>b</sup> Suhaidi Shafie,<sup>c</sup> Mohd Nazim Mohtar,<sup>c</sup> Likun Pan,<sup>d</sup> Zhiwei Zhao<sup>a\*</sup>*

<sup>a</sup> Joint International Research Laboratory of Information Display and Visualization, School of Electronic Science and Engineering, Southeast University, Nanjing 210096, People's Republic of China

<sup>b</sup> State Key Laboratory of Lake Science and Environment, Nanjing Institute of Geography and Limnology Chinese Academy of Sciences, Nanjing 210008, People's Republic of China

<sup>c</sup> Institute of Nanoscience and Nanotechnology, University Putra Malaysia, Serdang, Selangor, Malaysia

<sup>d</sup> Shanghai Key Laboratory of Magnetic Resonance, School of Physics and Electronic Science, East China Normal University, Shanghai 200241, People's Republic of China

† Electronic supplementary information (ESI) available. See DOI:

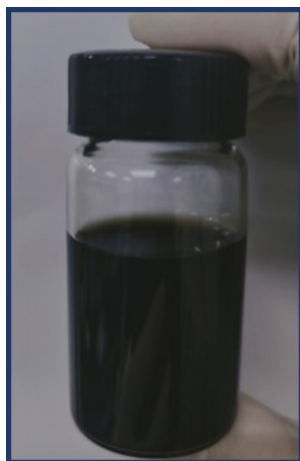

**Fig. S1** The optical photographs of the prepared CQDs solution.

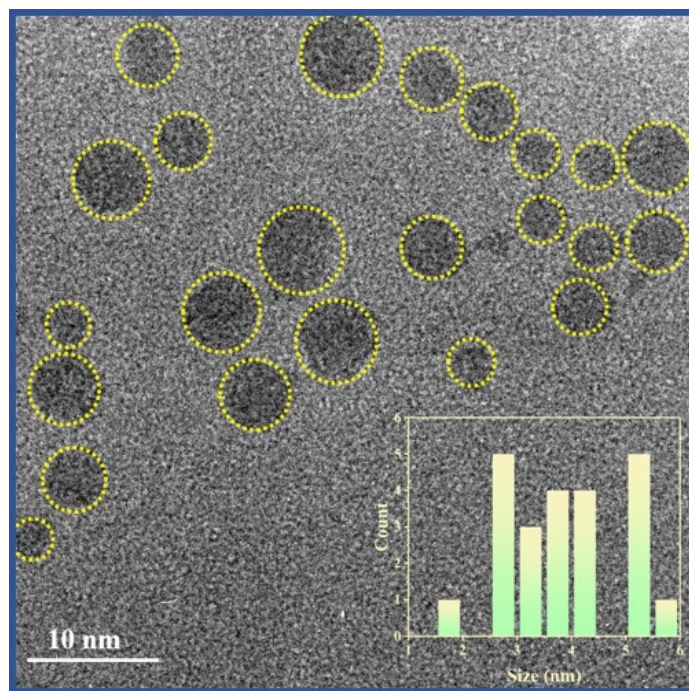

**Fig. S2** The TEM image of CQDs at a scale of 10 nm.

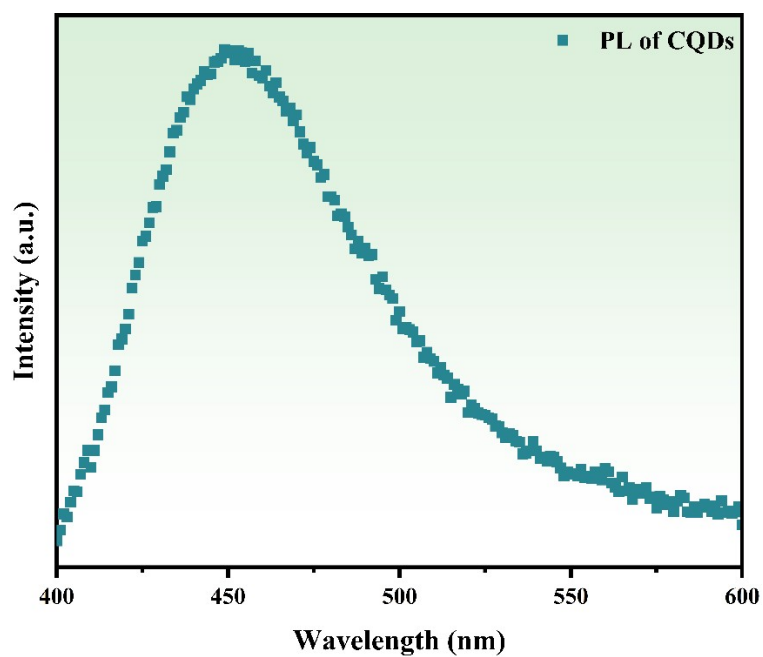

**Fig. S3** The PL spectrum of CQDs.

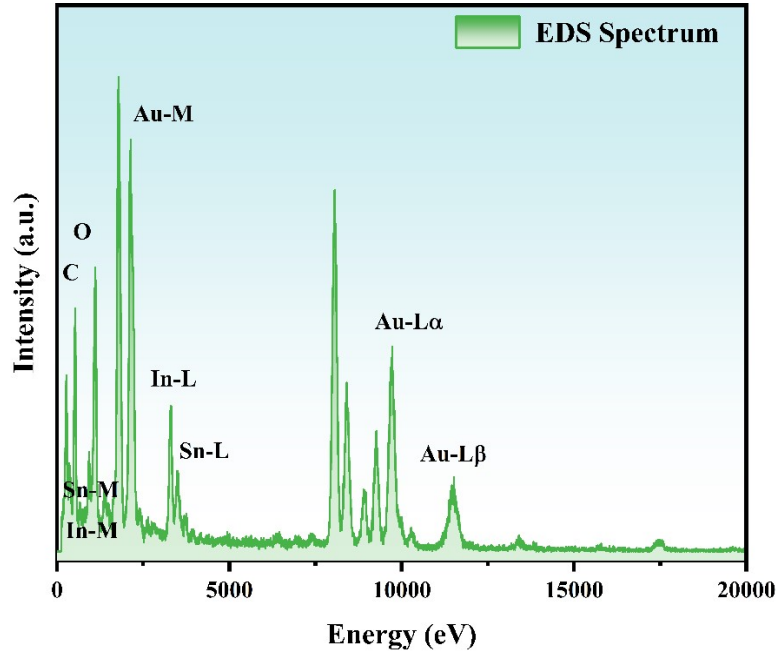

**Fig. S4** The EDS spectrum of Au/CQDs/ITO memristor

**Table S1** Comparison with previously reported devices

| No | Memristor                                              | $V_{Set}$ (V) | $V_{Reset}$ (V) | $C_V$ of $V_{Set}$ | $C_V$ of $V_{Reset}$ | Ref.            |
|----|--------------------------------------------------------|---------------|-----------------|--------------------|----------------------|-----------------|
| 1  | ITO/CQDs/Au                                            | -0.83         | 1.20            | -1.55%             | 0.08%                | <b>Our work</b> |
| 2  | Ti/PdSeO <sub>x</sub> /PdSe <sub>2</sub> /A            | 0.7           | -0.9            | 4.8%               | -3.6%                | 1               |
|    | u                                                      |               |                 |                    |                      |                 |
| 3  | Pt/Ti/SiO <sub>2</sub> /Ni/Cr                          | 1.6           | -0.77           | 11.3%              | -13%                 | 2               |
| 4  | TiN/HfO <sub>2</sub> /Pt                               | -1.31         | 1.54            | -11.5%             | 17.5                 | 3               |
| 5  | Ta/TaO <sub>x</sub> /Pt                                | -0.55         | 0.94            | -10.9%             | 5.3%                 | 4               |
| 6  | Ti/a-BN/Si                                             | 3.1           | -1.7            | 3.2%               | -12.2%               | 5               |
| 7  | Au/MoS <sub>2</sub> Au                                 | 1             | -1.25           | N                  | N                    | 6               |
| 8  | Au/h-BN/Au                                             | 2.7           | -0.9            | 2.0%               | -9.6%                | 7               |
| 9  | Pt/HfO <sub>2</sub> /Al <sub>2</sub> O <sub>3</sub> /W | 1.43          | -0.54           | 18.9%              | -12.9%               | 8               |
| 10 | ITO/TiO <sub>2</sub> /HfO <sub>2</sub> /Pt             | 3.1           | -1.8            | 2.8%               | -2.7%                | 9               |
| 11 | Ag/ZnO/WS <sub>2</sub> /Al                             | 1.4           | -1.4            | N                  | N                    | 10              |
| 12 | Ag/WS <sub>2</sub> /Pt                                 | 3.12          | -2.93           | 22.1%              | -23.9%               | 11              |
| 13 | Graphene/MoS <sub>2</sub> -<br>xOx/Graphene            | 1.2           | -1              | N                  | N                    | 12              |

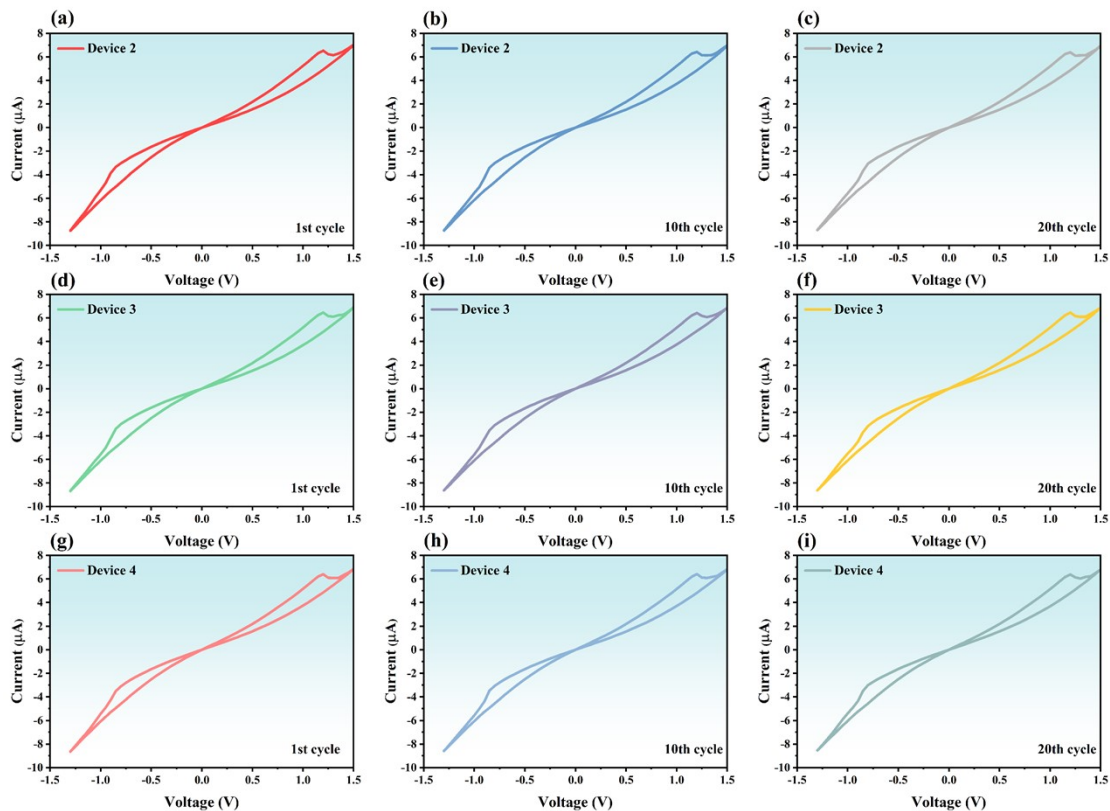

**Fig. S5** I-V curves of different devices from the same batch.

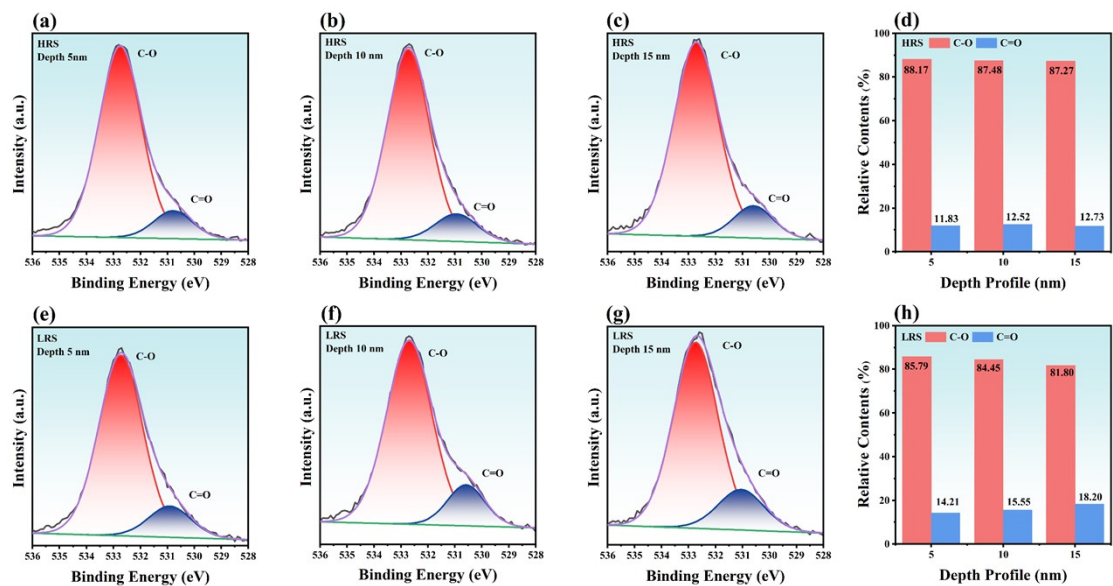

**Fig. S6** (a, b, c) XPS of O1s in CQDs film at different depths (5 nm, 10 nm and 15 nm) of HRS. (e, f, g) XPS of O1s in CQDs film at different depths (5 nm, 10 nm and 15 nm) of LRS. (d, h) The schematic diagrams of the percentage content of functional group at each analysis depth of HRS and LRS.

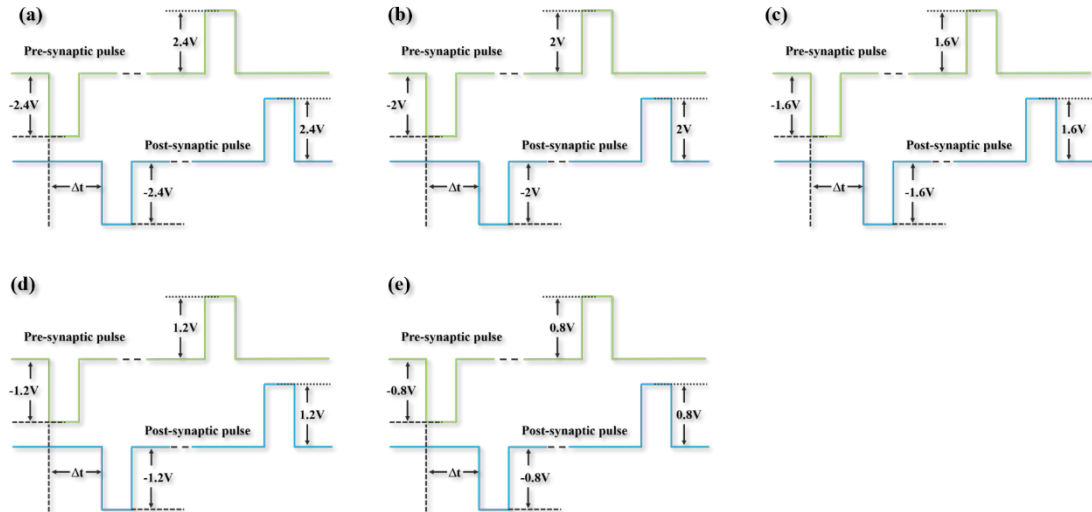

**Fig. S7** Pulse waveform used to measure STDP.

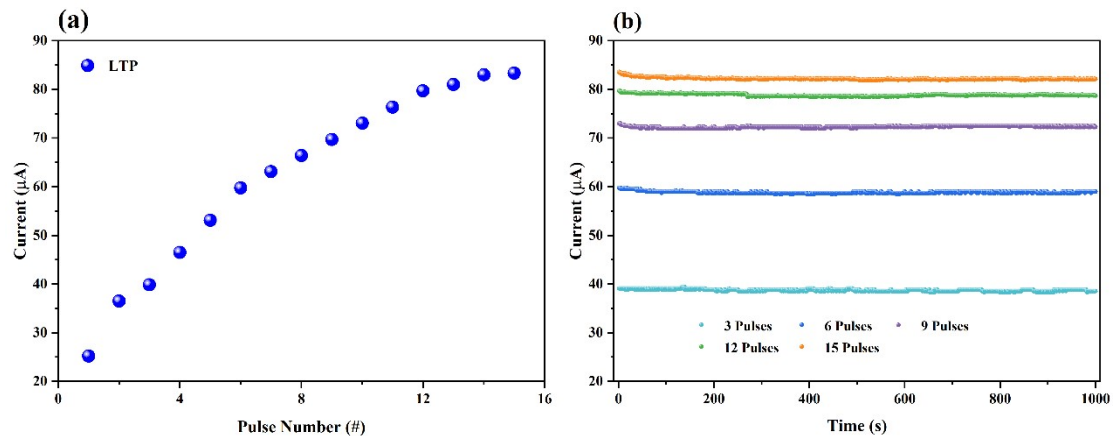

**Fig. S8** (a) The LTP characteristic curve for resistive switching. (b) The retention time characteristic curve.

## References

1. Y. Li, S. Chen, Z. Yu, S. Li, Y. Xiong, M. E. Pam, Y. W. Zhang and K. W. Ang, *Adv Mater*, 2022, **34**, e2201488.
2. B. K. You, W. I. Park, J. M. Kim, K.-I. Park, H. K. Seo, J. Y. Lee, Y. S. Jung and K. J. Lee, *ACS Nano*, 2014, **8**, 9492-9502.
3. S. Petzold, A. Zintler, R. Eilhardt, E. Piros, N. Kaiser, S. U. Sharath, T. Vogel, M. Major, K. P. McKenna, L. Molina-Luna and L. Alff, *Advanced Electronic Materials*, 2019, **5**.
4. D. S. Kuzmichev, Y. Y. Lebedinskii, C. S. Hwang and A. M. Markeev, *physica status solidi (RRL) – Rapid Research Letters*, 2018, **12**.
5. J. Lee, J. H. Ryu, B. Kim, F. Hussain, C. Mahata, E. Sim, M. Ismail, Y. Abbas, H. Abbas, D. K. Lee, M. H. Kim, Y. Kim, C. Choi, B. G. Park and S. Kim, *ACS Appl Mater Interfaces*, 2020, **12**, 33908-33916.
6. R. Ge, X. Wu, M. Kim, J. Shi, S. Sonde, L. Tao, Y. Zhang, J. C. Lee and D. Akinwande, *Nano Lett*, 2018, **18**, 434-441.
7. S. Chen, M. R. Mahmoodi, Y. Shi, C. Mahata, B. Yuan, X. Liang, C. Wen, F. Hui, D.

- Akinwande, D. B. Strukov and M. Lanza, *Nature Electronics*, 2020, **3**, 638-645.
8. E. Shahrabi, C. Giovinazzo, M. Hadad, T. LaGrange, M. Ramos, C. Ricciardi and Y. Leblebici, *Advanced Electronic Materials*, 2019, **5**.
  9. R. Zhang, H. Huang, Q. Xia, C. Ye, X. Wei, J. Wang, L. Zhang and L. Q. Zhu, *Advanced Electronic Materials*, 2019, **5**.
  10. M. Kumar, D. K. Ban, S. M. Kim, J. Kim and C. P. Wong, *Advanced Electronic Materials*, 2019, **5**.
  11. X. Yan, C. Qin, C. Lu, J. Zhao, R. Zhao, D. Ren, Z. Zhou, H. Wang, J. Wang, L. Zhang, X. Li, Y. Pei, G. Wang, Q. Zhao, K. Wang, Z. Xiao and H. Li, *ACS Appl Mater Interfaces*, 2019, **11**, 48029-48038.
  12. M. Wang, S. Cai, C. Pan, C. Wang, X. Lian, Y. Zhuo, K. Xu, T. Cao, X. Pan, B. Wang, S.-J. Liang, J. J. Yang, P. Wang and F. Miao, *Nature Electronics*, 2018, **1**, 130-136.
